# Supplementary material
Source: PubMed Central journal article supplement (PMC4524132)
Supplement: AEM.00315-15_zam999116325so1.pdf [file AEM.00315-15_zam999116325so1.pdf]

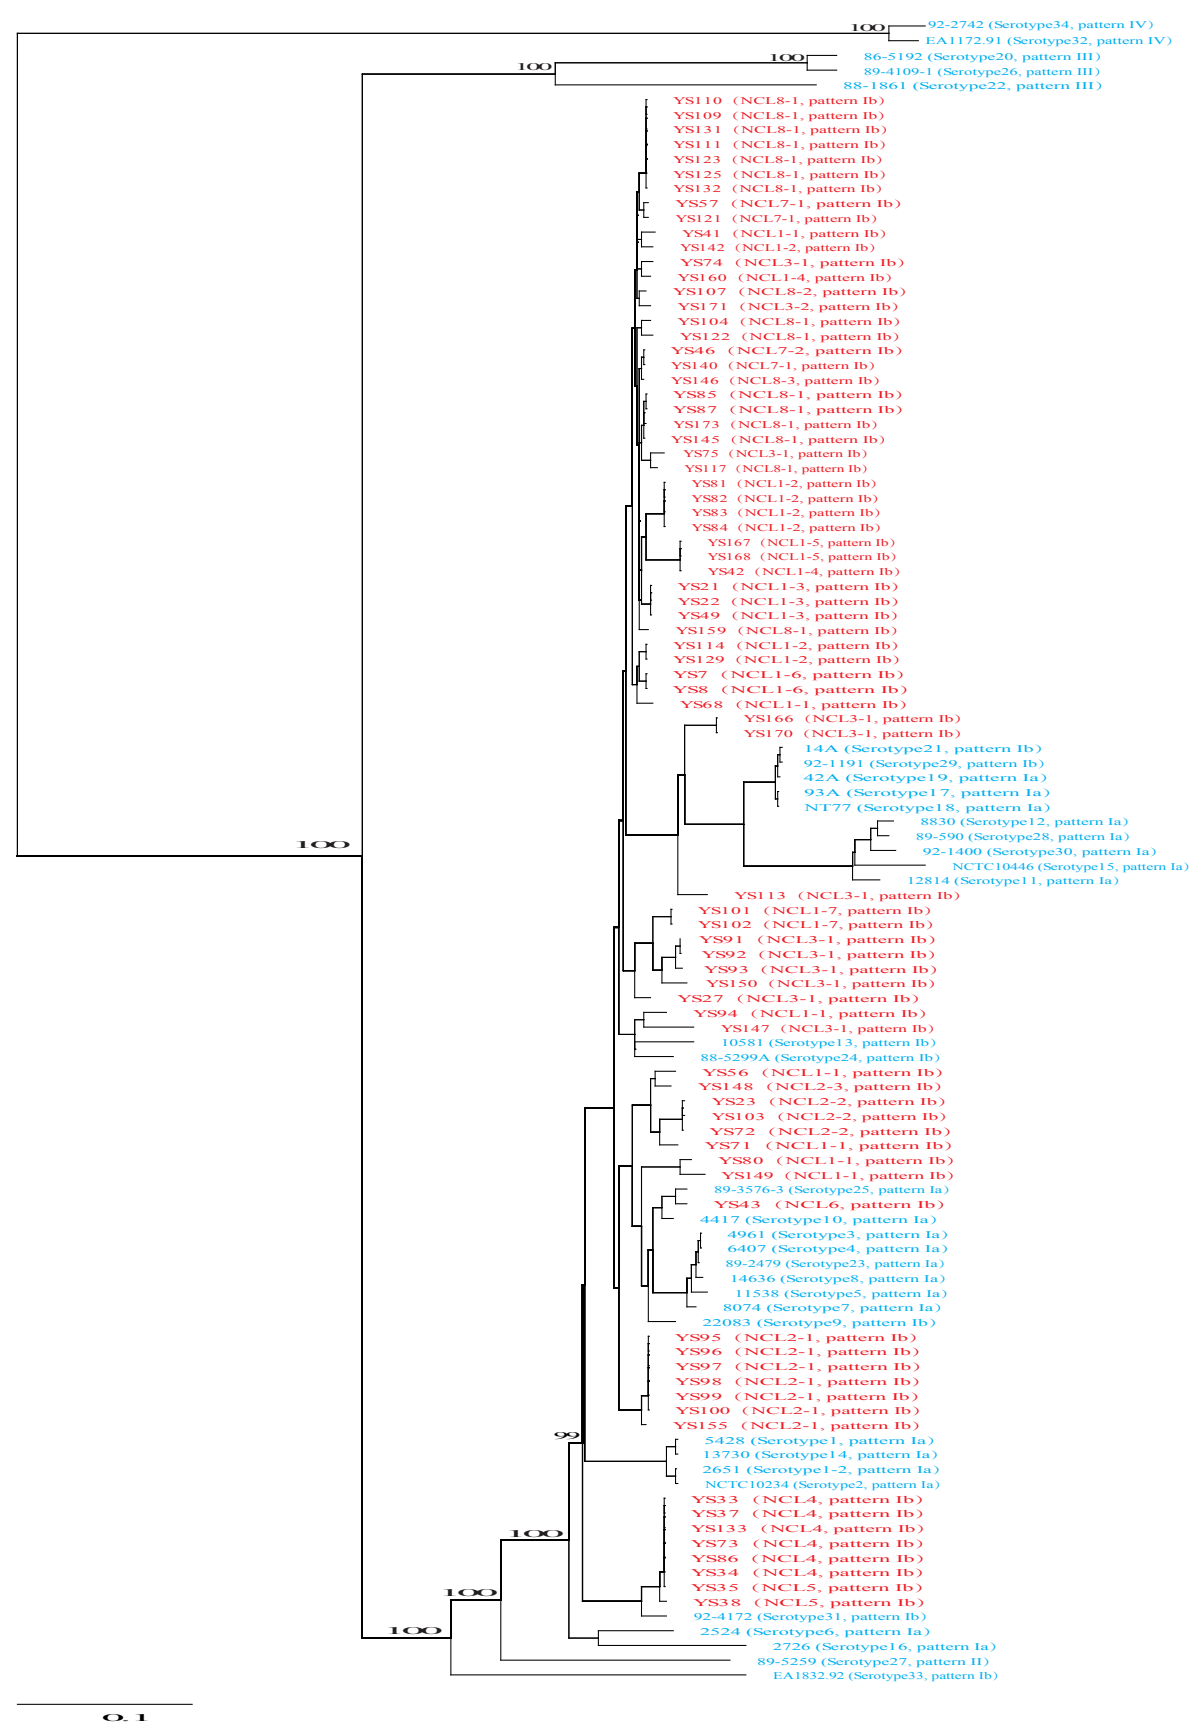

Figure S1: Neighbor-joining phylogenetic tree based on the alignment of *cpsA-cpsD* regions of the 35 reference strains and 78 isolates used in the study. The unrooted tree was constructed using the nucleotide sequence from the start of the coding region of *cpsA* to the end of the coding region of *cpsD*. The confidence values were obtained using 1,000 nonparametric bootstrap replicates. 35 serotype reference strains are marked in blue. 78 isolates are marked in red. Bar, sequence dissimilarity.
